# Supplementary material for: Experience of Patients with Diabetes and Other Cardiovascular Risk Factors with Health Professionals and Healthcare in Spain
Source: MDPI journal article supplement (doi:10.3390/jcm10132831), 2021-06-26
Supplement: s1 [file s1]

**Table S1.** Results of the IEXPAC questionnaire stratified by age group

| Age group (years) | IEXPAC overall score |                 |         | Item 12 |                 |         | Productive interactions |                 |         | New relational model |                 |         | Patient self-management |                 |         |
|-------------------|----------------------|-----------------|---------|---------|-----------------|---------|-------------------------|-----------------|---------|----------------------|-----------------|---------|-------------------------|-----------------|---------|
|                   | N                    | Mean value (SD) | P-value | N       | Mean value (SD) | P-value | N                       | Mean value (SD) | P-value | N                    | Mean value (SD) | P-value | N                       | Mean value (SD) | P-value |
| < 65              | 47                   | 7.13<br>(1.37)  | 0.155   | 25      | 5.80<br>(4.43)  | 0.061   | 47                      | 8.91<br>(1.56)  | 0.764   | 48                   | 3.12<br>(2.55)  | 0.005   | 47                      | 8.35<br>(1.54)  | 0.315   |
| 65 to <70         | 49                   | 7.12<br>(1.60)  |         | 29      | 7.07<br>(4.28)  |         | 53                      | 8.83<br>(1.37)  |         | 50                   | 3.20<br>(2.95)  |         | 54                      | 8.43<br>(1.51)  |         |
| 70 to <80         | 91                   | 6.70<br>(1.20)  |         | 91      | 5.19<br>(4.64)  |         | 96                      | 9.01<br>(1.24)  |         | 94                   | 2.06<br>(2.04)  |         | 96                      | 8.02<br>(1.68)  |         |
| > 80              | 42                   | 6.71<br>(1.39)  |         | 42      | 8.056<br>(2.91) |         | 47                      | 9.10<br>(1.27)  |         | 42                   | 1.96<br>(2.50)  |         | 46                      | 8.00<br>(1.50)  |         |

IEXPAC, Instrument for the Evaluation of the Experience of Chronic Patients.

**Table S2.** Patient experience with healthcare professionals and care based on the presence of comorbidities.

| Comorbidity                       | IEXPAC score |                         |                      |                 |                                    |
|-----------------------------------|--------------|-------------------------|----------------------|-----------------|------------------------------------|
|                                   | Total        | Productive interactions | New relational model | Self-management | Follow-up after hospital discharge |
| With coronary artery disease      | 7.0          | 6.2                     | 9.1                  | 2.8             | 8.1                                |
| Without coronary artery disease   | 6.9          | 6.2                     | 8.9                  | 2.5             | 8.2                                |
| With heart failure                | 6.6          | 7.3                     | 9.0                  | 1.9             | 7.7                                |
| Without heart failure             | 6.9          | 6.1                     | 9.0                  | 2.6             | 8.2                                |
| With peripheral artery disease    | 6.9          | 5.5                     | 9.1                  | 2.2             | 8.3                                |
| Without peripheral artery disease | 6.9          | 6.3                     | 9.0                  | 2.5             | 8.2                                |
| With cerebrovascular disease      | 6.8          | 6.3                     | 9.1                  | 1.7             | 8.2                                |
| Without cerebrovascular disease   | 6.9          | 6.2                     | 9.0                  | 2.6             | 8.2                                |
| With depression                   | 6.7          | 5.8                     | 8.8                  | 2.4             | 8.0                                |
| Without depression                | 6.9          | 6.3                     | 9.0                  | 2.5             | 8.2                                |
| With arthrosis                    | 6.7          | 5.9                     | 8.9                  | 2.2             | 8.0                                |
| Without arthrosis                 | 7.0          | 6.4                     | 9.0                  | 2.8             | 8.3                                |
| With COPD                         | 6.5          | 7.0                     | 8.9                  | 2.2             | 7.8                                |
| Without COPD                      | 6.9          | 6.2                     | 9.0                  | 2.5             | 8.2                                |

IEXPAC, Instrument for the Evaluation of the Experience of Chronic Patients.
